# Supplementary material for: The riddle of recurrent fever: a clinical approach to pediatric autoinflammatory diseases
Source: PubMed Central journal article supplement (PMC11605516; doi:10.3389/fped.2024.1448176), 2024-11-15
Supplement: Table1.pdf [file Table1.pdf]

## Overview of autoinflammatory diseases

| Class                                                                                                  | Disease                                                                                                                                                                                        | Genetic defect                            | Functional defect                                                                                        | Clinical picture                                                                                                                                                            | Diagnostic work-up                                                                                                                                                                                  |                                                                                                                               |
|--------------------------------------------------------------------------------------------------------|------------------------------------------------------------------------------------------------------------------------------------------------------------------------------------------------|-------------------------------------------|----------------------------------------------------------------------------------------------------------|-----------------------------------------------------------------------------------------------------------------------------------------------------------------------------|-----------------------------------------------------------------------------------------------------------------------------------------------------------------------------------------------------|-------------------------------------------------------------------------------------------------------------------------------|
| TYPE I INTERFERONOPATHIES                                                                              | AD STING-associated vasculopathy, infantile-onset                                                                                                                                              | TMEM173 AD                                | STING activates both the NF-κB and IRF3 transcription pathways to induce expression of IFN               | Early-onset inflammatory disease, skin vasculopathy, inflammatory lung disease, systemic autoinflammation and ICC, FCL.                                                     | APR, Capillaroscopy, chest CT, PFT, Cardiac US, ANA/ANCA, cytokine profiling (IP-10), ISG score, genetic analysis                                                                                   |                                                                                                                               |
|                                                                                                        | AR STING-associated vasculopathy, infantile-onset                                                                                                                                              | TMEM173 AR                                |                                                                                                          | FTT, early onset rash, fever, dyspnea, interstitial lung disease/pneumonitis, polyarthritis, autoAbs, increased inflammatory markers, IFN gene signature.                   |                                                                                                                                                                                                     |                                                                                                                               |
|                                                                                                        | Aicardi-Goutières Syndrome                                                                                                                                                                     | TREX1 AR-AD (AGS1)                        | Intracellular accumulation of abnormal ss DNA species leading to increased type I IFN production         | Progressive encephalopathy, ICC, cerebral atrophy, HSMG, leukodystrophy, thrombocytopenia, elevated hepatic transaminases, chronic cerebrospinal fluid (CSF) lymphocytosis. | CBC, liver function, APR, X-ray vertebrae and ribs, brain imaging (MRI/CT), EEG, CSF analysis, ophthalmological evaluation, capillaroscopy, cytokine profiling (IP-10), ISG score, genetic analysis |                                                                                                                               |
|                                                                                                        |                                                                                                                                                                                                | RNASEH2A AR (AGS2)                        | Intracellular accumulation of abnormal RNA-DNA hybrid species leading to increased type I IFN production |                                                                                                                                                                             |                                                                                                                                                                                                     |                                                                                                                               |
|                                                                                                        |                                                                                                                                                                                                | RNASEH2B AR (AGS3)                        |                                                                                                          |                                                                                                                                                                             |                                                                                                                                                                                                     |                                                                                                                               |
|                                                                                                        |                                                                                                                                                                                                | RNASEH2C AR (AGS4)                        |                                                                                                          |                                                                                                                                                                             |                                                                                                                                                                                                     |                                                                                                                               |
|                                                                                                        |                                                                                                                                                                                                | SAMHD1 AR (AGS5)                          | Controls dNTPs in the cytosol, failure of which leads to increased type I IFN production                 |                                                                                                                                                                             |                                                                                                                                                                                                     |                                                                                                                               |
| ADAR1 AR (AGS6)                                                                                        | Catalyzes the deamination of adenosine to inosine in dsRNA substrates, failure of which leads to increased type I IFN production                                                               |                                           |                                                                                                          |                                                                                                                                                                             |                                                                                                                                                                                                     |                                                                                                                               |
| IFIH1 AD GOF (AGS7)                                                                                    | IFIH1 gene encodes a cytoplasmic viral RNA receptor that activates type I interferon signaling through the MAVS adaptor molecule                                                               |                                           |                                                                                                          |                                                                                                                                                                             |                                                                                                                                                                                                     |                                                                                                                               |
| DEFECTS AFFECTING THE INFLAMMASOME                                                                     | Familial Mediterranean Fever (FMF)                                                                                                                                                             | MEFV AR LOF - AD                          | Increased inflammasome-mediated induction of IL1β                                                        | Recurrent fever, serositis and inflammation responsive to colchicine. Predisposes to vasculitis and inflammatory bowel disease.                                             | APR, urine sediment, genetic analysis, trial with colchicine                                                                                                                                        |                                                                                                                               |
|                                                                                                        | Mevalonate kinase deficiency (Hyper IgD syndrome)                                                                                                                                              | MVK AR                                    | Affecting cholesterol synthesis, pathogenesis of disease unclear                                         | Cervical adenopathy. Oral aphthosis. Diarrhea. Mevalonate aciduria during attacks.                                                                                          | APR, (IgD), urine MA, abd US, cytokine profiling, genetic analysis                                                                                                                                  |                                                                                                                               |
|                                                                                                        | Cryopyrin-Associated Periodic Syndrome (CAPS)                                                                                                                                                  | Muckle-Wells syndrome                     | NLRP3 AD GOF                                                                                             | Defect in cryopyrin, involved in leukocyte apoptosis and NF-κB signaling and IL-1 processing                                                                                | Continuous fever, urticaria, Deafness (SNHL), conjunctivitis, amyloidosis.                                                                                                                          | APR, audiogram, ophthalmological evaluation, CSF analysis, X-ray joints, urine sediment, cytokine profiling, genetic analysis |
|                                                                                                        |                                                                                                                                                                                                | Familial Cold Autoinflammatory Syndrome 1 |                                                                                                          |                                                                                                                                                                             | Non-pruritic urticaria, arthritis, chills, fever and leukocytosis after cold exposure.                                                                                                              |                                                                                                                               |
| Neonatal onset multi system inflammatory disease (NOMID) or chronic infantile neurologic cutaneous and | Neonatal onset rash, with continuous fever and inflammation. Aseptic and chronic meningitis, chronic arthropathy. Mental retardation, sensorineural deafness and visual loss in some patients. |                                           |                                                                                                          |                                                                                                                                                                             |                                                                                                                                                                                                     |                                                                                                                               |

|                                                     |                                                                                                      |                                                                                     |                                                                                                                                           |                                                                                                                                           |                                                                                                                 |
|-----------------------------------------------------|------------------------------------------------------------------------------------------------------|-------------------------------------------------------------------------------------|-------------------------------------------------------------------------------------------------------------------------------------------|-------------------------------------------------------------------------------------------------------------------------------------------|-----------------------------------------------------------------------------------------------------------------|
|                                                     | articular syndrome (CINCA)                                                                           |                                                                                     |                                                                                                                                           |                                                                                                                                           |                                                                                                                 |
|                                                     | Familial cold autoinflammatory syndrome 2 (FCAS2)                                                    | NLRP12 AD GOF                                                                       |                                                                                                                                           | Non-pruritic urticaria, arthritis, chills, fever and leukocytosis after cold exposure.                                                    | APR, audiogram, abd US, cytokine profiling, genetic analysis                                                    |
|                                                     | NLR4-MAS (macrophage activating syndrome)                                                            | NLR4 AD GOF                                                                         | Gain of function mutation in NLR4 results in elevated secretion of IL-1 $\beta$ and IL-18 as well as macrophage activation                | Severe enterocolitis and macrophage activation syndrome.                                                                                  | APR (ferritin!), enterocoloscopy, cytokine profiling (IL18), genetic analysis                                   |
|                                                     | Autoinflammation with arthritis and dyskeratosis (AIADK)                                             | NLRP1 AR                                                                            | Systemic elevation of IL-18 and caspase 1, suggesting involvement of NLRP1 inflammasome                                                   | Dyskeratosis, autoimmunity and arthritis                                                                                                  | CBC, APR, ANA, vit A, cytokine profiling, genetic analysis                                                      |
|                                                     | Autoinflammation with episodic fever and lymphadenopathy (AIEFL)                                     | RIPK1 AD                                                                            | Increased inflammatory markers and pro-inflammatory cytokines/gene signature                                                              | Autoinflammatory disorder: regular/prolonged fevers, lymphadenopathy, HSM, ulcers, arthralgia, GI features                                | APR, abd US, cytokine profiling, genetic analysis                                                               |
| NON-INFLAMMASOME RELATED CONDITIONS                 | TNF receptor-associated periodic syndrome (TRAPS)                                                    | TNFRSF1A AD                                                                         | Mutations of 55-kD TNF receptor leading to intracellular receptor retention or diminished soluble cytokine receptor available to bind TNF | Recurrent fever, serositis, rash, and ocular or joint inflammation.                                                                       | APR, urine sediment, cytokine profiling, genetic analysis                                                       |
|                                                     | Pyogenic sterile arthritis, pyoderma gangrenosum, acne (PAPA) syndrome                               | PSTPIP1 (C2BP1) AD                                                                  | Disordered actin reorganization leading to compromised physiologic signaling during inflammatory response                                 | Destructive arthritis, pyoderma gangrenosum, inflammatory skin rash, myositis, acute-phase response during attacks.                       | APR, synovial fluid analysis, skin biopsy, cytokine profiling, genetic analysis                                 |
|                                                     | Chronic recurrent multifocal osteomyelitis and congenital dyserythropoietic anemia (Majeed syndrome) | LPIN2 AR                                                                            | Undefined                                                                                                                                 | Chronic recurrent multifocal osteomyelitis, transfusion-dependent anemia, cutaneous inflammatory disorders.                               | CBC, APR, MRI limbs/joints, abd US, cytokine profiling, genetic analysis                                        |
|                                                     | Deficiency of the Interleukin 1 Receptor Antagonist (DIRA)                                           | IL1RN AR                                                                            | Mutations in the IL1 receptor antagonist allow unopposed action of Interleukin 1                                                          | Continuous inflammation. Neonatal onset of sterile multifocal osteomyelitis, periostitis and pustulosis.                                  | APR, X-ray/MRI full body, skin/bone biopsy, abd US, chest CT, cytokine profiling, genetic analysis              |
|                                                     | Deficiency of interleukin-36 receptor antagonist (DITRA)                                             | IL-36RN AR                                                                          | Mutations in IL-36RN leads to increase IL-8 production                                                                                    | Life-threatening, multisystemic inflammatory disease characterized by episodic widespread, pustular psoriasis, malaise, and leukocytosis. | APR, skin biopsy, cytokine profiling, genetic analysis                                                          |
|                                                     | Blau syndrome                                                                                        | NOD2 (CARD15) AD                                                                    | Mutations in nucleotide binding site of CARD15, possibly disrupting interactions with lipopolysaccharides and NF-kB signaling             | Uveitis, granulomatous synovitis, camptodactyly, rash and cranial neuropathies, 30% develop Crohn colitis.                                | APR, skin biopsy, ophthalmological evaluation, cytokine profiling, X-ray joints, calprotectin, genetic analysis |
|                                                     | UNDEFINED                                                                                            | Periodic fever with aphthous stomatitis, pharyngitis, and adenitis syndrome (PFAPA) | No known monogenetic defect                                                                                                               | Undefined, presumed inflammasome mediated origin                                                                                          | Episodic attacks of fever, pharyngitis, cervical adenitis or aphthous stomatitis                                |
| Syndrome of undifferentiated recurrent fever (SURF) |                                                                                                      | No known monogenetic defect                                                         | Undefined                                                                                                                                 | Self-limiting episodes of systemic inflammation with diverse clinical presentation                                                        | APR, cytokine profiling, genetic analysis, trial with colchicine                                                |

Supplementary Table 1. Overview of the presented autoinflammatory diseases, adapted from the IUIS classification of Tangye et al, 2022 (10).

*Abd US* abdominal ultrasound *AD* autosomal dominant *AGS* Aicardi-Goutières syndrome *AIHA* autoimmune hemolytic anemia *APR* acute phase reactants *AR* autosomal recessive *Class* Classification *CBC* complete blood count *CSF* cerebrospinal fluid *FCL* familial chilblain lupus *GOF* gain-of-function *ICC* intracranial calcification *HSM* hepatosplenomegaly *IFN* interferon *LOF* loss-of-function *MA* mevalonic acid *PFT* Pulmonary Function Test *SLE* systemic lupus erythematosus *SNHL* sensorineural hearing loss *SP* spastic paraparesis
